# Supplementary material
Source: publisher figshare collection journal article supplement (https://gsajournals.figshare.com/articles/dataset/_/7195802)
Supplement: Supplementary file 1 [file 1]

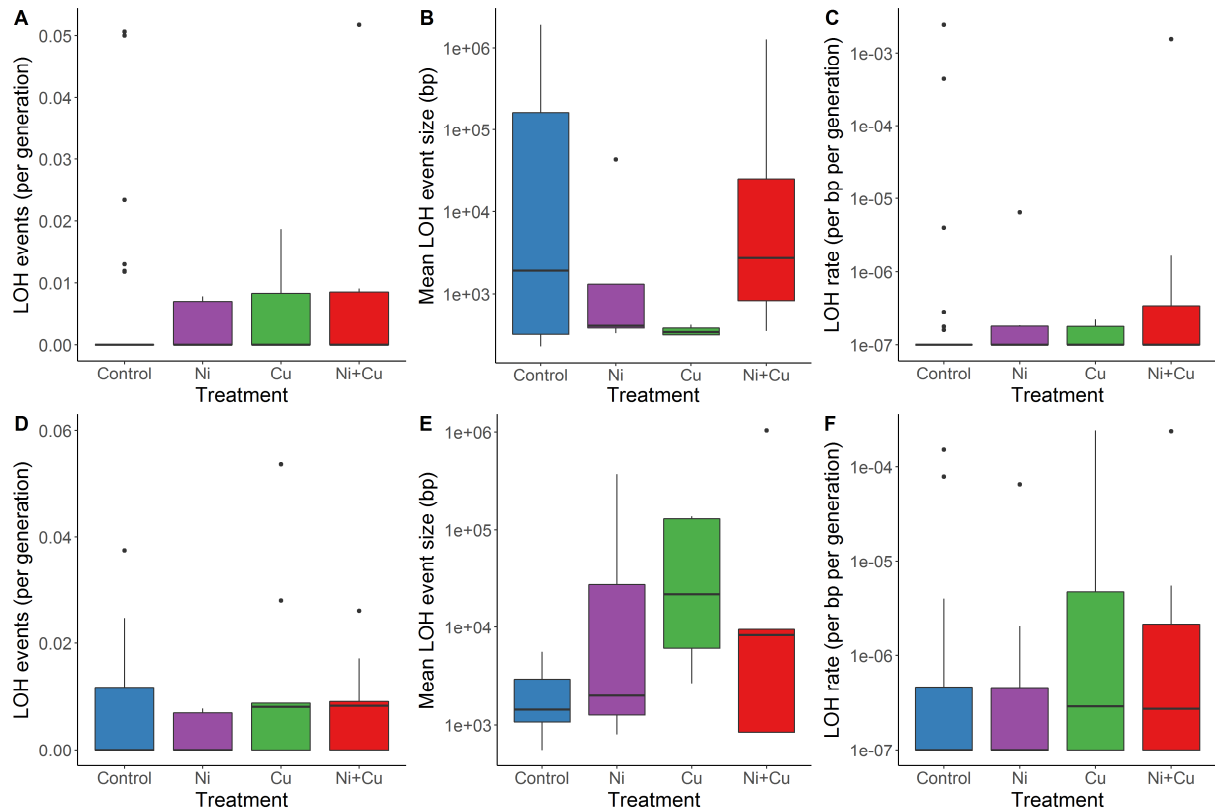

**Figure S1. Loss of heterozygosity (LOH) under mutation accumulation.** (A,D) Number of loss-of-heterozygosity events per generation, (B,E) mean LOH event size (log-scale), and (C,F) LOH rate (log-scale) in *Daphnia pulex* mutation-accumulation lines exposed to metal-free (Control) conditions and to low-levels of nickel (Ni), copper (Cu), or nickel and copper (Ni+Cu). Sub-figures A,B,C are for gene conversion events only and subfigures D,E,F are for hemizygous deletion events only. A small value ( $10^{-7}$ ) was added to each value in C,F to allow plotting on a log-scale as there were many values of zero. n = 28 for Control and 9 for other treatments

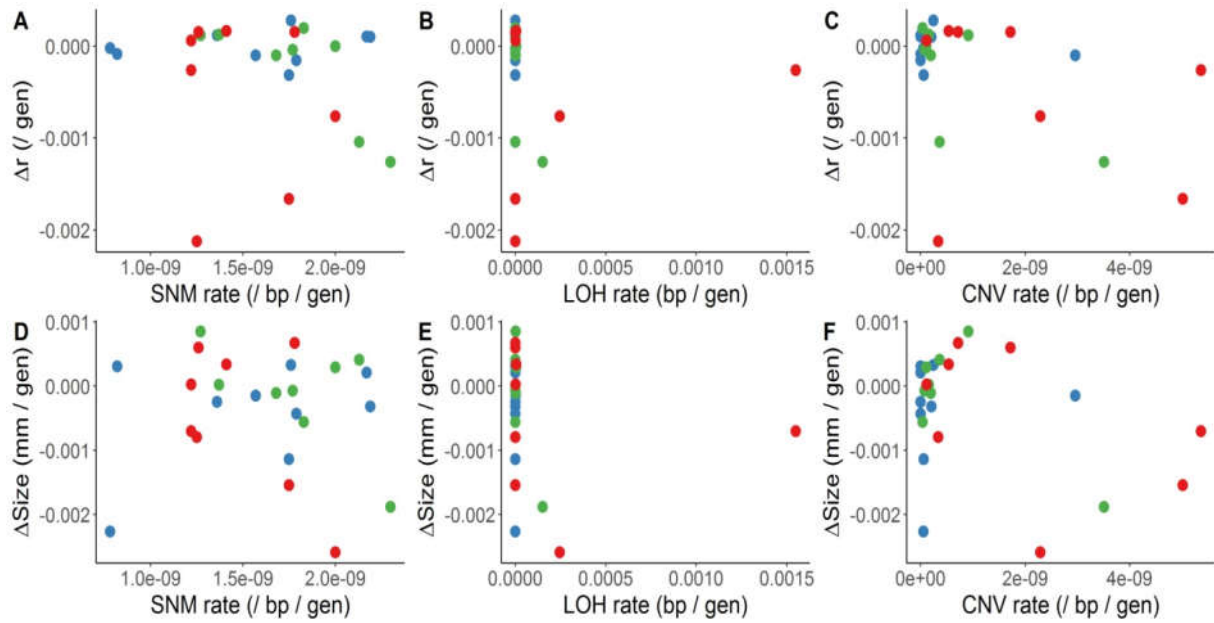

**Figure S2. Life-history evolution as a function of mutation rates.** (A,B,C) Per generation change in intrinsic rate of increase ( $r$ ) and (D,E,F) body size as a function of (A,D) single nucleotide mutation rate (square-root scale), (B,E) loss-of-heterozygosity (LOH) rate (log-scale), and (C,F) copy number variant (CNV) rate (log-scale) in *Daphnia pulex* mutation-accumulation lines exposed to metal-free (control) conditions (blue) and to low-levels of copper (green) or nickel and copper (red).  $n = 25$  across treatments.
